# Supplementary material for: Flexible fluorine containing ionic binders to mitigate the negative impact caused by the drastic volume fluctuation from silicon nano-particles in high capacity anodes of lithium-ion batteries
Source: Royal Society of Chemistry journal article supplement (doi:10.1039/c5ta02367j), 2015-01-01
Supplement: c5ta02367j1.pdf [file c5ta02367j1.pdf]

## Supporting Information

# Flexible Fluorine Containing Ionic Binders to Mitigate the Negative Impact Caused by The Drastic Volume Fluctuation from Silicon Nano-Particles in High Capacity Anodes of Lithium-Ion Battery

Dejun Qin, Lixin Xue\*\*, Bing Du, Jian Wang, Feng Nie, and Lele Wen\*

### Synthesis of PSI-K

Potassium fluorinated sulfonimide salt (PSI-K) was prepared from an iodo perfluorinated sulfonyl fluoride (PSA) precursor (Shanghai Sino fluoro Scientific Co., Ltd, China) following the reaction scheme presented in Scheme S1. The PSA was reacted with 4-toluene sulfonamide in CH<sub>3</sub>CN (HPLC, Aladdin, China) for 4 h and the product PSI-K was prepared.

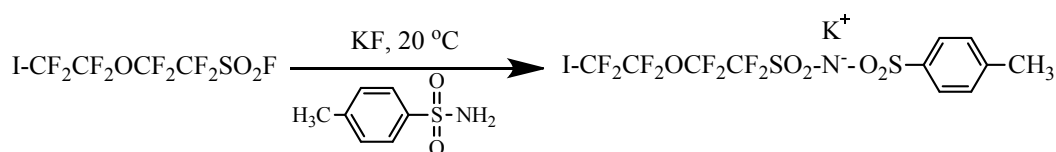

**Scheme S1.** Synthesis of PSI-K

### Synthesis of ionic polymer

The SPEEK-PSA-Li was prepared from sulfonated polyether ether ketone with PSA as our previous work,<sup>1</sup> the SPEEK-PSI-Li and PSU-PSI-Li were prepared with the similar procedure, as Scheme S2 shown, firstly the SPEEK-Br and PSU-Br were prepared, SPEEK was dissolved in the sulfuric acid and stirred for another 24 h and PSU was dissolved in the dimethyl sulfoxide (DMSO) respectively, then the bromine was added into the solution and stirred for 24 h at 30 °C, the products were washed with deionized water and dried at 60 °C. The fluorinated sulfonimide (PSI) group was grafted to the polymer via coupling reaction by adding the prepared PSI-K into the SPEEK-Br and PSU-Br in DMSO solvent with the copper powder as the catalyst respectively. The mixture were stirred for 10 h at 120 °C, the resulting compound were precipitated in hydrochloric acid solution

and washed several times to remove the copper powder. The prepared ionic polymer was immersed into the 1 mol L<sup>-1</sup> of lithium hydroxide solution for 24 h, then lithiated ionic polymer SPEEK-PSI-Li and PSU-PSI-Li were prepared.

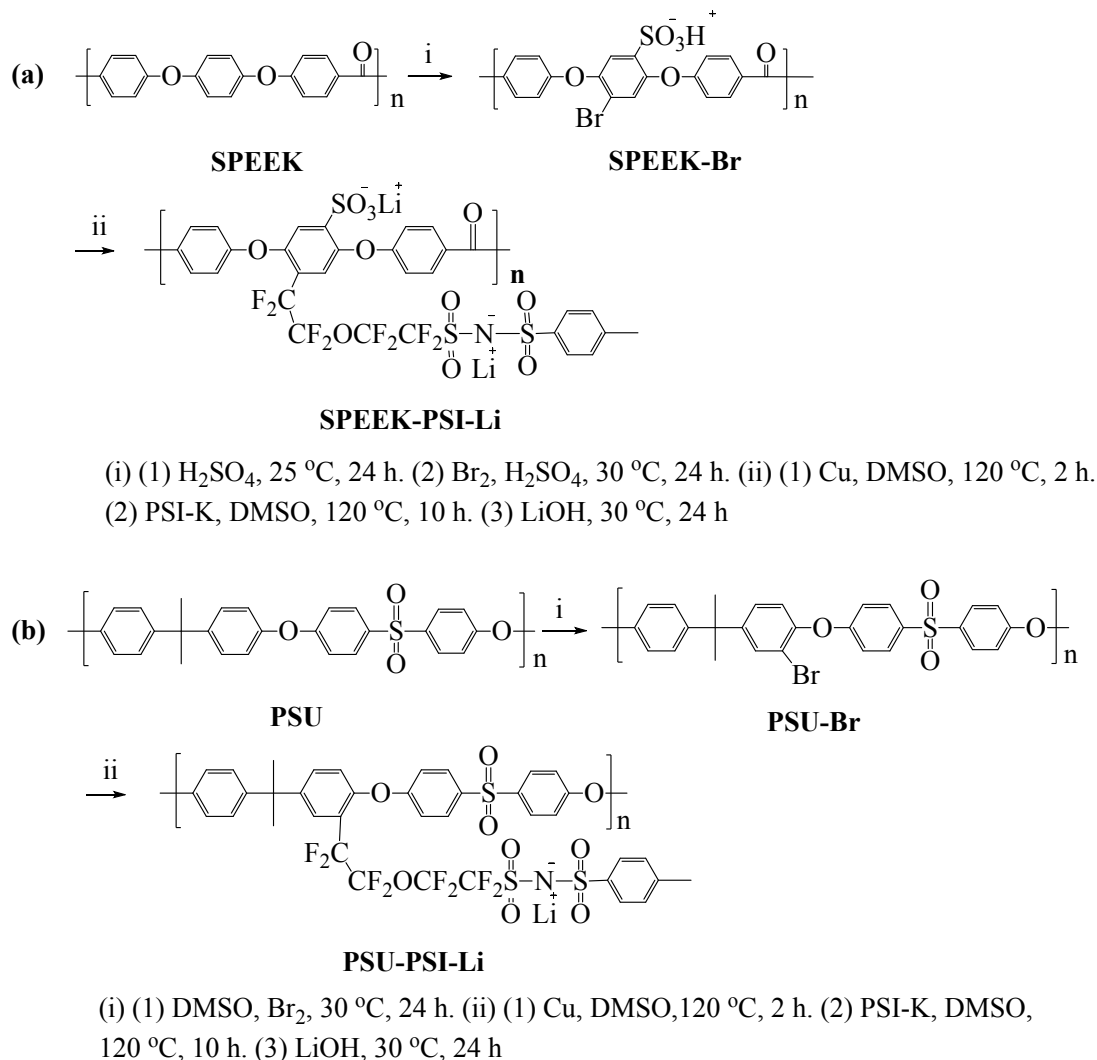

**Scheme S2.** Synthesis of (a) SPEEK-PSI-Li and (b) PSU-PSI-Li

### Characterization of PSI-K, SPEEK-PSI-Li and PSU-PSI-Li

<sup>19</sup>FNMR spectra were recorded for PSA, PSI, SPEEK-PSA-Li, SPEEK-PSI-Li and PSU-PSI-Li using a Bruker AV-400 spectrometer at 400 MHz using DMSO-d<sub>6</sub> as lock solvent. As demonstrated in Fig. S1, the PSA exhibits four obvious single peaks corresponding the four CF<sub>2</sub> groups from the molecular, the chemistry shift of -82.9 and -86.1 were attributed to CF<sub>2</sub>OCF<sub>2</sub>, the -73.9 and -113.2 were attributed to ICF<sub>2</sub> and CF<sub>2</sub>SO<sub>2</sub>F, comparatively, the four CF<sub>2</sub> groups of PSI-K

are changed to -81.2, -85.5 (CF<sub>2</sub>OCF<sub>2</sub>), -72.8 (ICF<sub>2</sub>), -116.2 (CF<sub>2</sub>SO<sub>2</sub>) ppm respectively. After the iodo-group was reacted with the SPEEK-Br (PSU-Br), the chemical shift of ICF<sub>2</sub> at -72.8 ppm disappeared and a new peak around -110.9 ppm could be found which indicated the PSI group had been successfully grafted to SPEEK (PSU) backbone.

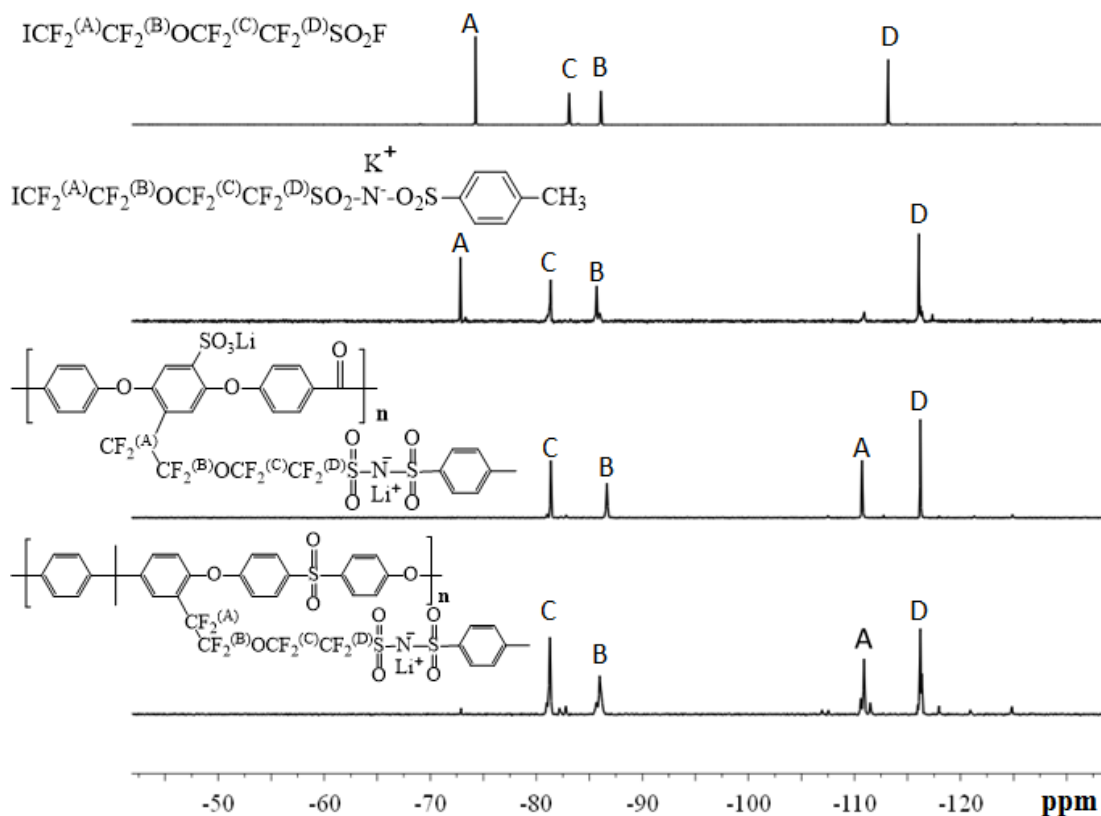

**Fig. S1.** (a) SPEEK-PSI-Li and (b) PSU-PSI-Li

1. Z. Wei, L. Xue, F. Nie, J. Sheng, Q. Shi and X. Zhao, *J. Power Sources*, 2014, **256**, 28-31.
